# Supplementary material
Source: PubMed Central journal article supplement (PMC6262461)

# Supporting information for: Quantifying Co-Oligomer Formation by Alpha-Synuclein

Marija Iljina\*, Alexander J. Dear\*, Gonzalo A. Garcia, Suman De, Laura Tosatto, Patrick Flagmeier, Daniel R. Whiten, Thomas C. T. Michaels, Daan Frenkel, Christopher M. Dobson, Tuomas P. J. Knowles\*\*, and David Klenerman\*\*

*\*Equally contributing authors.*

*\*\* Correspondence may be addressed to: [tpjk2@cam.ac.uk](mailto:tpjk2@cam.ac.uk), [dk10012@cam.ac.uk](mailto:dk10012@cam.ac.uk)*

## Supporting Methods

### TEM Imaging

We have previously shown that the fluorescently-labelled proteins used in this study,  $\alpha$ S isoforms,<sup>S1-S3</sup> tau k18<sup>S4</sup> and A $\beta$ 40 or A $\beta$ 42<sup>S5</sup> can assemble into amyloid fibrils. Because in this study we aimed to characterise oligomer formation, we chose the conditions that would minimise fibril formation such as low total protein concentrations and absence of agitation. We carried out transmission electron microscopy (TEM) imaging to visualise protein solutions following the sample preparation and incubation protocols as described above, at the highest protein concentrations, 3  $\mu$ M. 10-15  $\mu$ L volumes of the samples were applied onto carbon-coated 400-mesh copper grids (EM Resolutions) for 5 min and washed with distilled

water. The application was repeated in the cases when the absorbed aggregate density was too low. Negative staining was carried out by using 2% (w/v) uranyl acetate. TEM images were acquired using Tecnai G2 microscope (13218, EDAX, AMETEK) operating at an excitation voltage of 200 kV. Representative images are shown in Supplementary Fig. 1, and amyloid fibril formation was observed only in the samples containing A $\beta$  isoforms, and absent in all other protein solutions.

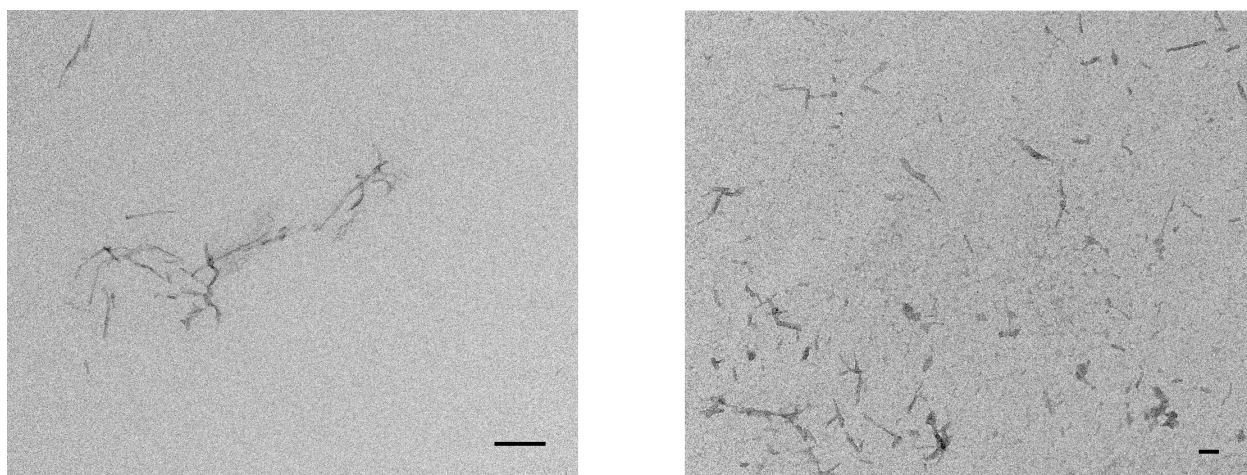

Figure S1: Representative TEM images of fluorescently labelled protein samples following 72-h incubation under quiescent conditions at 3  $\mu$ M total protein concentration. Left: WT:A $\beta$ 40 1:1, right: WT:A $\beta$ 42 (scale bar 100 nm in both images).

## TCCD controls using free dyes in solution

To confirm that the TCCD experiments were measuring the interactions between protein molecules rather than a random association of the fluorescent dyes, control measurements were performed using pairs of free fluorescent dyes in solution. The free unbound dyes were prepared by reacting 5 mM of AF488 NHS ester (Succinimidyl ester) or 5 mM of AF594 NHS ester with Tris.HCl (pH 7.2, 250 mM) at room temperature for 3 h. The solutions were further diluted with PBS buffer, defined previously, aliquoted and stored at  $-80^{\circ}\text{C}$ . For the experiments, 1:1 molar ratio of AF488 and AF594 were combined up to the total concentration of 500 nM, recorded immediately after the preparation and then following

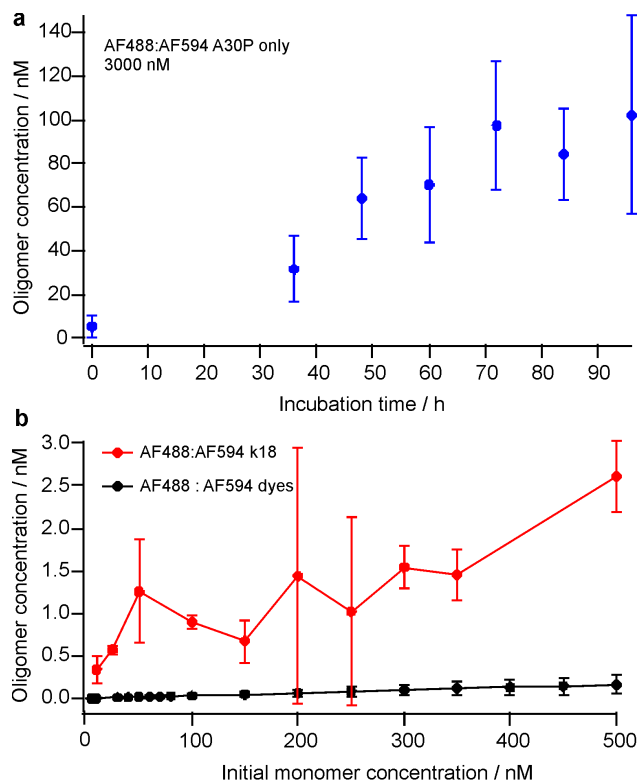

Figure S2: (a) Timecourse of oligomer formation by A30P point-mutant at the starting total protein concentration of 3  $\mu$ M, recorded by sm-TCCD ( $n=3$ , SEM). (b) Result of control sm-TCCD measurement of free 1:1 AF488 and AF594 dye mixture, derived from a triplicated measurement of  $Q$  (eq. 1, main text) multiplied by a range of numbers between 0-500 nM, using the same analysis as for the derivation of apparent oligomer concentrations for the measurements of protein solutions in sm-TCCD experiments. The results obtained for k18 self-oligomerising system are shown in a range of nM concentrations for comparison (full range is in main text, Fig. 1), where samples were measured in triplicate for every starting protein concentration. Most of the data-points for the protein measurement are above the control values derived from the measurement of free dyes in solution, confirming that sm-TCCD experiments were quantifying the protein aggregates.

a 72-h incubation at the same incubation conditions as for the protein samples. For the detection using TCCD, the samples were diluted to 100 pM, and recorded under flow using the same procedure and settings as for the detection of protein samples, and the resulting  $Q$  (eq. 1, main text) was multiplied by a range of values corresponding to the starting total protein concentrations (i.e. following the same analysis as for the protein datasets). The result is presented in Supplementary Fig. 2 and compared to the data obtained for k18 protein solutions, which yielded the lowest apparent oligomer concentrations across all analysed self-oligomerising systems.

The control measurement of free dyes was repeated at the total concentration of 3  $\mu\text{M}$ . Following the same analysis as for the protein samples, it yielded  $0.64 \pm 0.12$  nM ( $n=3$ , SD) from the free dyes. In comparison, the lowest oligomer concentration measured at the same starting monomer concentration (3  $\mu\text{M}$ ) is from tau k18 solutions and is  $4.9 \pm 0.88$  nM ( $n=3$ , SD), followed by  $18.18 \pm 5.93$  nM ( $n=3$ , SD) from WT:k18 samples and much higher concentrations from all other samples that were investigated over this monomer concentration range. Therefore, the results at higher concentration of the free dye solution are consistent with the results presented in Fig. S2(b).

## **Measurements of critical aggregation concentration of A $\beta$ isoforms in the presence of WT $\alpha\text{S}$**

Having observed fibril formation in the 1:1 samples of  $\alpha\text{S}$  and A $\beta$ 40 or A $\beta$ 42, we sought to determine whether these species were self-fibrils of A $\beta$ , or mixed fibrils containing A $\beta$  and  $\alpha\text{S}$ . This question cannot be straightforwardly answered using high-resolution fluorescence imaging methods, by monitoring the degree of overlap of fluorescently-labelled  $\alpha\text{S}$  and A $\beta$  within fibrillar aggregates, because the overlap may be due to either mixed fibrillar structures, or due to intertwined self-fibrils of the two proteins, which is plausible due to the propensity of fibrils to clump. Therefore, we employed an alternative measurement, by determining whether the critical aggregation concentration (CAC) of A $\beta$  is altered by the presence of  $\alpha\text{S}$ . In our previous work, we used a single-molecule technique to measure the CAC of fluorescently labelled A $\beta$  isoforms A $\beta$ 40 and A $\beta$ 42 in aqueous buffer, by measuring the concentration of monomeric peptide released from pre-formed fibrils into aqueous solution at equilibrium, and reported values of  $94 \pm 37$  nM for A $\beta$ 40, and  $28 \pm 4$  nM for A $\beta$ 42.<sup>S5</sup> The experimental protocols for these measurements are fully described in our previous study.<sup>S5</sup> Following the same protocols, we measured the CAC of fluorescently labelled A $\beta$  isoforms in the presence of 500 nM of unlabelled WT  $\alpha\text{S}$ . The obtained values in this experiment were  $101 \pm 27$  nM and  $32 \pm 8$  nM for A $\beta$ 40 and A $\beta$ 42, respectively, which was in close agreement with the

previously measured values in the absence of  $\alpha$ S. This result suggested the absence of the effect of soluble  $\alpha$ S on A $\beta$  fibrillization, favouring the explanation that A $\beta$  assembled into self-fibrils under our experimental conditions.

Table S1:  $\Delta G^\circ$  values of oligomerisation, derived from the fitting of sm-TCCD data as described in the main text. The summary of these values is in Fig. 3 (main text).

| <b>Protein combination</b> | $\Delta G^\circ$ /kJmol <sup>-1</sup> | <b>Error in <math>\Delta G^\circ</math></b> |
|----------------------------|---------------------------------------|---------------------------------------------|
| A30P-A30P                  | -26.9                                 | 1.37                                        |
| A53T-A53T                  | -25.2                                 | 0.44                                        |
| E46K-E46K                  | -28.7                                 | 0.59                                        |
| k18-k18                    | -19.4                                 | 0.49                                        |
| WT-WT                      | -24.0                                 | 0.31                                        |
| WT-A30P                    | -24.4                                 | 0.85                                        |
| WT-A53T                    | -27.1                                 | 0.46                                        |
| WT-E46K                    | -28.7                                 | 0.64                                        |
| WT-k18                     | -22.7                                 | 0.75                                        |
| WT-A $\beta$ 40            | -29.4                                 | 0.62                                        |
| WT-A $\beta$ 42            | -30.8                                 | 1.03                                        |

## Self-Oligomer Modelling

In our previous work,<sup>S5</sup> a streamlined statistical mechanical model was developed to describe equilibrium oligomer size distributions and to extract the free energy of oligomer growth by single-species monomer addition. Filamentous growth was assumed, such that oligomers are treated as one-dimensional chains. A single equilibrium constant  $K$  then describes oligomer formation and growth at temperature  $T$  in a reaction volume  $V$ . We summarize here the key equations describing this model (for more detail, see our previous paper<sup>S5</sup>).

## Statistical Mechanical Linear Oligomer Model

The grand canonical partition function for a system containing linear oligomers up to size  $M$ , assuming no interaction between oligomers, is found to be

$$\Xi(T, V, \mu) = \exp \left( \sum_{j=1}^M q_j(T, V) e^{\beta j \mu} \right). \quad (1)$$

where  $q_j(T, V)$  is the canonical partition function of a  $j$ -mer. The number of clusters of size  $j$  is then given by

$$N_j(T, V) = q_j(T, V) e^{\beta j \mu}. \quad (2)$$

The partition function  $q_j(T, V)$ , or  $q(j)$ , can be factorized into translational and internal components:  $q(j) = q_{\text{trans}}(j) q_{\text{int}}(j)$ . The translational partition function  $q_{\text{trans}}(j)$  is proportional to the system volume, and so can be written as  $q_{\text{trans}} = V/v_0(j)$ , where  $v_0(j)$  is a fundamental volume (in the gaseous phase, it is given by the cube of the thermal wavelength). The concentration of  $j$ -mers is given by  $f(j) \equiv N_j(T, V)/(N_A V)$ , where  $N_A$  is Avogadro's number:

$$f(j) = \frac{1}{N_A v_0(j)} q_{\text{int}}(j) e^{\beta j \mu}. \quad (3)$$

The chemical potential  $\mu$  is set implicitly by conservation of the initial total monomeric protein concentration  $m_{\text{tot}}$ :

$$\sum_{j=1}^M j f(j) = -\frac{1}{N_A V} \frac{k_B T}{\Xi} \frac{\partial \Xi}{\partial \mu} = m_{\text{tot}}. \quad (4)$$

### Oligomer partition function

We assume size-independent oligomer growth and shrinkage rates, such that  $q_{\text{int}}(j) \approx e^{-\beta \varepsilon (j-1)}$  and  $v_0(j) \equiv v_0$ . The resulting expression for the oligomer size distribution is:

$$f(j) = \frac{1}{N_A v_0} e^{-\beta \varepsilon (j-1)} e^{\beta j \mu}. \quad (5)$$

The now size-independent standard free energy change  $\Delta G^\circ$  upon addition of a monomer to an oligomer is:

$$\Delta G^\circ = -RT \ln K = -RT \ln \frac{\frac{f(j+1)}{c_0}}{\frac{f(1)}{c_0} \cdot \frac{f(j)}{c_0}} = \epsilon - RT \ln (N_A c_0 v_0). \quad (6)$$

This shows that  $\epsilon$  is the free energy measured at standard concentration  $c_0 = 1/(N_A v_0)$ . Hence, we choose  $v_0 = 1/(N_A c_0)$  for convenience, such that  $\Delta G^\circ = \epsilon$ , where standard conditions are chosen as  $T = 25^\circ\text{C}$  and  $c_0 = 1\text{ M}$ .

## Correcting for experimental observations and fitting

In each experiment, half of the monomer species are labeled “red”, and the other half “blue”. Only oligomers which contain at least one red monomer and at least one blue monomer are accounted for in our apparent oligomer concentration measurements; all single-color species detected are branded free monomer molecules by the experimental procedure, and the two labels are assumed to have no differing effects besides introducing a degree of distinguishability between molecules.

Eq. (3) is thus modified to take into account the two colors:

$$f(j_1, j - j_1) = \frac{1}{N_A v_0} e^{-\beta \epsilon(j-1)} e^{\beta j \mu} \binom{j}{j_1} \quad (7)$$

where  $f(j_1, j_2)$  denotes the concentration of oligomers of size  $j = j_1 + j_2$  monomers, of which  $j_1$  are red and  $j_2$  are blue. The apparent size distribution  $f_{\text{exp}}(j)$  is then:

$$f_{\text{exp}}(j) = \begin{cases} \sum_{j_1=1}^M f(j_1, 0) + \sum_{j_2=1}^M f(0, j_2) & j = 1 \\ \sum_{j_1=1}^{j-1} f(j_1, j - j_1) & j > 1 \end{cases}. \quad (8)$$

Combining Eqs. (7) and (8), the total apparent oligomer concentration  $F_{\text{exp}}$  is given by:

$$F_{\text{exp}} = \sum_{j=2}^M \frac{2^{j-1}}{N_A v_0} e^{-\beta \varepsilon(j-1)} e^{\beta j \mu} \quad (9)$$

The conservation-of-mass condition is also modified, and becomes:

$$\sum_{j=1}^M \sum_{j_1=0}^j j_1 \cdot f(j_1, j - j_1) = -\frac{1}{2} \frac{1}{N_A V} \frac{k_B T}{\Xi} \frac{\partial \Xi}{\partial \mu} = \frac{1}{2} m_{\text{tot}}. \quad (10)$$

Eq. (9), with  $M$  chosen to be large enough to encompass virtually all oligomers, can be fitted directly via least-squares methods to experimental measurements of equilibrium apparent oligomer concentrations, with  $\varepsilon$  as the sole fitting parameter. At each step,  $\mu$  is evaluated numerically from the implicit analytical conservation-of-mass condition Eq. (10).

## Oligomer sizes

Having obtained fitted values for  $\varepsilon$ , it is possible to simulate oligomer size distributions formed by different  $\alpha$ S mutants at different initial monomer concentrations. It may be shown that, at the concentrations visited by our study, oligomers formed by the mutants under investigation are predominantly dimeric. For example, at 1  $\mu$ M, 99% of oligomers formed by WT  $\alpha$ S are dimeric. The steep decline in the size distributions implies that possible deviations from linear geometry at larger sizes will not significantly perturb our analysis, justifying our choice of a linear model.

## Co-oligomer Modelling

The approach detailed above was generalized in our previous work<sup>S5</sup> to consider the co-oligomerization of two monomeric species to form dimers. Here, we go further and develop a model for co-oligomerization of two species to form linear oligomers of any length.



## Exact solution

The grand canonical partition function for a co-oligomerizing ensemble of 2 different monomer types is given as a direct generalization of Eq. (1):

$$\Xi(T, V, \vec{\mu}) = \exp \left( \sum_{j_1=0}^{\infty} \sum_{j_2=0}^{\infty} q_{\vec{j}}(T, V) e^{\beta \vec{j} \cdot \vec{\mu}} \right), \quad (11)$$

where  $\vec{j} = (j_1, j_2)$  is a composition vector whose components  $j_i$  describe the number of monomeric residues of type  $i$ . Similarly,  $\vec{\mu} = (\mu_1, \mu_2)$  with  $\mu_i$  being the chemical potential associated with species  $i$ ,  $q_{\vec{j}}$  gives the canonical partition function for an oligomer with composition described by  $\vec{j}$ . If nearest-neighbor interactions dominate,  $q_{\vec{j}}(T, V)$  is given by:

$$q_{\vec{j}}(T, V) \approx \frac{V}{v_0} \sum_{o(\vec{j})} e^{-\beta U(\vec{j}, o(\vec{j}))}, \quad (12)$$

where  $U(\vec{j}, o(\vec{j}))$  denotes the internal energy of an oligomer with composition  $\vec{j}$  and with monomer units arranged in an order specified by  $o(\vec{j})$ ; a sum must be carried out over all possible arrangements. The concentration of oligomers with composition  $\vec{j}$  is then given by:

$$f(\vec{j}) = \frac{1}{N_A v_0} \sum_{o(\vec{j})} e^{-\beta U(\vec{j}, o(\vec{j}))} e^{\beta \vec{j} \cdot \vec{\mu}}. \quad (13)$$

The chemical potential  $\mu_i$  of monomer type  $i$  is defined for corresponding initial type  $i$  total monomeric protein concentration  $m_{\text{tot}}^i$  by

$$\sum_{j_1=0}^{\infty} \sum_{j_2=0}^{\infty} j_i f(\vec{j}) = -\frac{1}{N_A V} \frac{k_B T}{\Xi} \frac{\partial \Xi}{\partial \mu_i} = m_{\text{tot}}^i. \quad (14)$$

The sum over arrangements  $o(\vec{j})$  can be carried out by noting that if the number of cross-bonds  $x$  present in a  $J$ -mer is known, then  $U(\vec{j}, o(\vec{j}))$  is almost uniquely defined. There are three cases to consider:  $x$  is odd (contributions to sum must be multiplied by a factor of 2 as chains have directionality);  $x$  is even and the chain terminates with type 1 monomers on

both ends;  $x$  is even and the chain terminates with type 2 monomers on both ends. These three cases all give different energies, and so the Boltzmann factors for each of these energies must be multiplied by the relevant degeneracy and added together to give the contribution to  $q(\vec{j})$  for each value of  $x$ . A sum can then be carried out over all possible values of  $x$  to arrive at a final expression, setting  $x = 2r$  or  $x = 2r - 1$  in the relevant sums to ensure only odd or even values are included as required. We ultimately arrive at the expression:

$$\frac{q(\vec{j})}{V/v_0} = \begin{cases} e^{-\beta\varepsilon_{2,2}(J-1)}, & j_1 = 0 \\ e^{-\beta\varepsilon_{1,1}(J-1)}, & j_2 = 0 \\ 2 \sum_{r=1}^{\text{Min}(j_1, j_2)} \binom{j_1-1}{r-1} \binom{j_2-1}{r-1} e^{-\beta E(j_1, j_2, r, 1)} \\ + \mathcal{H}[j_1 - 2] \sum_{r=1}^{\text{AltMin}(j_1, j_2)} \binom{j_1-1}{r} \binom{j_2-1}{r-1} e^{-\beta E(j_1, j_2, r, 2)} \\ + \mathcal{H}[j_2 - 2] \sum_{r=1}^{\text{AltMin}(j_1, j_2)} \binom{j_2-1}{r} \binom{j_1-1}{r-1} e^{-\beta E(j_1, j_2, r, 3)}, & j_1 > 0, j_2 > 0, \end{cases}, \quad (15)$$

where  $J = j_1 + j_2$ , and the smaller of the two numbers  $j_1$  and  $j_2$  is given by  $\text{Min}(j_1, j_2)$ . The discrete Heaviside step function is denoted  $\mathcal{H}[z]$ , defined such that  $\mathcal{H}[0] = 1$ , and the remaining functions are defined as follows:

$$\text{AltMin}(j_1, j_2) = \begin{cases} j_1 - 1 & j_1 = j_2 \\ \text{Min}(j_1, j_2) & j_1 \neq j_2 \end{cases}, \quad (16)$$

$$E(j_1, j_2, r, 1) = (j_1 - r) \varepsilon_{1,1} + (j_2 - r) \varepsilon_{2,2} + (2r - 1) \varepsilon_{1,2}, \quad (17)$$

$$E(j_1, j_2, r, 2) = (j_1 - r - 1) \varepsilon_{1,1} + (j_2 - r) \varepsilon_{2,2} + 2r \varepsilon_{1,2}, \quad (18)$$

$$E(j_1, j_2, r, 3) = (j_1 - r) \varepsilon_{1,1} + (j_2 - r - 1) \varepsilon_{2,2} + 2r \varepsilon_{1,2}. \quad (19)$$

## Correcting for experimental observations and fitting

Where one monomer type is labelled with AF488 dye and one with AF594 dye, then only mixed oligomers will be recorded. The total mixed oligomer concentration  $F(m_{\text{tot}}^{\vec{r}})$  is given from combining Eqs. (13) and (15):

$$\begin{aligned}
 F_{\text{exp}}(m_{\text{tot}}^{\vec{r}}) = & \sum_{j=2}^M \sum_{j_1=1}^{j-1} 2 \sum_{r=1}^{\text{Min}(j_1, j-j_1)} \binom{j_1-1}{r-1} \binom{j-j_1-1}{r-1} e^{-\beta E(j_1, j-j_1, r, 1)} \\
 & + \mathcal{H}[j_1-2] \sum_{r=1}^{\text{AltMin}(j_1, j-j_1)} \binom{j_1-1}{r} \binom{j-j_1-1}{r-1} e^{-\beta E(j_1, j-j_1, r, 2)} \\
 & + \mathcal{H}[j-j_1-2] \sum_{r=1}^{\text{AltMin}(j_1, j-j_1)} \binom{j-j_1-1}{r} \binom{j_1-1}{r-1} e^{-\beta E(j_1, j-j_1, r, 3)} \quad (20)
 \end{aligned}$$

This expression can then be fitted directly to experimental measurements.

The fitting procedure now involves evaluating both chemical potentials at each stage numerically from implicit algebraic expressions, obtained via Eq. (14) and Eq. (15). The sole fitting parameter is  $\varepsilon_{1,2}$ , once  $\varepsilon_{1,1}$  and  $\varepsilon_{2,2}$  are established from fits to self-oligomerization data sets. The same standard value for  $v_0$  is used for all fits.

## Justifying the choice of model

Our statistical mechanical modelling approach relies on a set of basic assumptions that are easily justified considering the experimental conditions and previous work. It has been established (see fig. S2) that chemical equilibrium is attained during the long equilibration times (72 hours) of our experiments (see also ref. S2). Furthermore, fibrils are known not to form at the low protein concentrations investigated here (see ref. S3). An equilibrium statistical mechanical model, considering only monomers and soluble oligomers, is thus clearly appropriate. At the low concentrations used (nM protein and pM oligomers), activities can be well-approximated by concentrations, and we can define equilibrium constants in the usual way. Furthermore, since oligomers are at such low concentrations, any possible bimolecu-

lar reactions involving oligomers are effectively suppressed, and we need only to consider monomer addition and subtraction reaction steps in a statistical mechanical model. For the same reason the equilibrium monomer concentration is well-approximated by the initial monomer concentration.

These assumptions are not enough to arrive at a unique model; we have further assumed that the populations of oligomers formed can be well-represented by a model that considers linear oligomers of any length. This model was chosen firstly because a wide range of amyloidogenic proteins form oligomers regardless of their primary sequence, implying that oligomers are held together by nonspecific interactions and can exist in a range of sizes. Secondly, we have little knowledge of the geometry of amyloid oligomers, and a linear geometry gives rise to the simplest model possible that allows a range of sizes.

Since there is no direct evidence that oligomers of a range of sizes form in these experiments, we now test the possibility that instead a specific kind of self-oligomer forms, with a specific size. These can be easily modeled in the same grand canonical framework as the existing model, by simply allowing only oligomers of size  $n$  to form. We test this model for  $n = 2, 3$  and  $4$ . We find that  $n = 3$  and  $n = 4$  give substantially worse fits, both in terms of sum-of-square-residuals and visually (see Figure S3 and Table S2). There is no need to consider higher values of  $n$ ; the oligomer concentration scales as the  $n^{\text{th}}$  power of the monomer concentration and the curvature of the data are clearly insufficient to support any higher values. As expected, since we have already calculated the best-fit linear size distribution to be dimer-dominated at the concentrations investigated, we find that  $n = 2$  gives fits similar in quality to the linear model.

We conclude that there is no especial preference for formation of a specific oligomer species of size  $n > 2$ . Although it is possible that the oligomers are formed via specific interactions that lead to dimers only, the marginal improvement in fit quality is insufficient to justify making this additional assumption of specificity. In any case, changing to this model would have no effect on the key results of our study, since bonding free energies

obtained under the dimer model are very close to those obtained from the linear model, as expected (see Table S3).

Additionally, it is now apparent that the curvature of the data in all experiments precludes the presence of significant concentrations of oligomers of size  $n > 2$ . The best fit to the data that is theoretically possible to obtain will thus be given by any model that permits the size distribution to be dimer-dominated. All such models will fit the data equally well and will give similar fitted bonding free energy values. There is therefore no reason to consider a model more complicated than the 1-parameter linear model. We do *not* conclude that alpha-synuclein oligomers are always linear in morphology, merely that there is no evidence of non-linear oligomers in the experiments performed in this study, and that no other physically reasonable model can therefore give a better description of the system under the present experimental conditions.

Finally, a visual inspection of the co-oligomer data reveals that again the curvature is insufficient to justify significant concentrations of  $n > 2$  oligomers, and the co-oligomer modelling approach can therefore be justified on the same grounds as the self-oligomer modelling approach.

Table S2: Residual sum-of-squares values for self-oligomer models (units: M)

| Oligomer type  | WT-WT                | A30P-A30P            | A53T-A53T            | E46K-E46K            | K18-K18              |
|----------------|----------------------|----------------------|----------------------|----------------------|----------------------|
| Linear model   | $2.1 \cdot 10^{-16}$ | $4.4 \cdot 10^{-15}$ | $5.6 \cdot 10^{-16}$ | $6.2 \cdot 10^{-15}$ | $4.1 \cdot 10^{-17}$ |
| Trimer model   | $4.8 \cdot 10^{-16}$ | $5.1 \cdot 10^{-15}$ | $1.0 \cdot 10^{-15}$ | $9.5 \cdot 10^{-15}$ | $6.0 \cdot 10^{-17}$ |
| Tetramer model | $7.2 \cdot 10^{-16}$ | $5.9 \cdot 10^{-15}$ | $1.5 \cdot 10^{-15}$ | $1.2 \cdot 10^{-14}$ | $7.5 \cdot 10^{-17}$ |
| Dimer model    | $2.0 \cdot 10^{-16}$ | $4.3 \cdot 10^{-15}$ | $5.4 \cdot 10^{-16}$ | $5.5 \cdot 10^{-15}$ | $4.0 \cdot 10^{-17}$ |

Table S3: Bond energy values for self-oligomer models (units: kJ mol<sup>-1</sup>)

| Oligomer type | WT-WT | A30P-A30P | A53T-A53T | E46K-E46K | K18-K18 |
|---------------|-------|-----------|-----------|-----------|---------|
| Linear model  | -24.0 | -26.9     | -25.2     | -28.7     | -19.4   |
| Dimer model   | -24.1 | -27.5     | -25.4     | -29.3     | -19.4   |

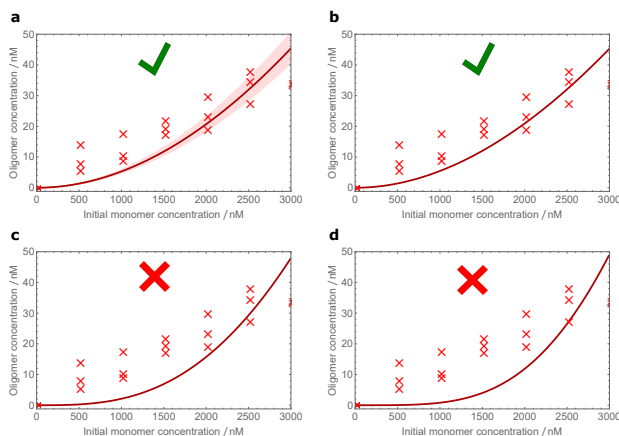

Figure S3: Fits of alternative models to WT-WT self-oligomer data. **a**: Fit to a linear model (the same as in Fig. 1e, main text). **b**: A dimer-only model gives an equally good fit. **c**: A trimer-only model gives a worse fit, having curvature significantly greater than that of the data. **d**: A tetramer-only model has even greater curvature and thus gives an even worse fit. Since the minimum possible curvature for a physically-reasonable model is given by the dimer-only model, and it is the low data curvature that is the primary source of fitting error, the linear and the dimer model give the best fit to the data that is theoretically possible.

## References

- (S1) Cremades, N.; Cohen, S. I. A.; Deas, E.; Abramov, A. Y.; Chen, A. Y.; Orte, A.; Sandal, M.; Clarke, R. W.; Dunne, P.; Aprile, F. A.; Bertocini, C. W.; Wood, N. W.; Knowles, T. P. J.; Dobson, C. M.; Klenerman, D. Direct Observation of the Interconversion of Normal and Toxic Forms of  $\alpha$ -Synuclein. *Cell* **2012**, *149*, 1048–1059.
- (S2) Tosatto, L.; Horrocks, M. H.; Dear, A. J.; Knowles, T. P. J.; Dalla Serra, M.; Cremades, N.; Dobson, C. M.; Klenerman, D. Single-Molecule FRET Studies on Alpha-Synuclein Oligomerization of Parkinson’s Disease Genetically Related Mutants. *Sci. Rep.* **2015**, *5*, 16696.
- (S3) Iljina, M.; Garcia, G. A.; Horrocks, M. H.; Tosatto, L.; Choi, M. L.; Ganzinger, K. A.; Abramov, A. Y.; Gandhi, S.; Wood, N. W.; Cremades, N.; Dobson, C. M.; Knowles, T. P. J.; Klenerman, D. Kinetic Model of the Aggregation of Alpha-Synuclein Provides Insights Into Prion-Like Spreading. *Proc. Natl. Acad. Sci. U. S. A.* **2016**, *113*, E1206–

E1215.

- (S4) Shammass, S. L.; Garcia, G. A.; Kumar, S.; Kjaergaard, M.; Horrocks, M. H.; Shivji, N.; Mandelkow, E.; Knowles, T. P. J.; Mandelkow, E.; Klenerman, D. A Mechanistic Model of Tau Amyloid Aggregation Based on Direct Observation of Oligomers. *Nat. Commun.* **2015**, *6*, 7025.
- (S5) Iljina, M.; Garcia, G. A.; Dear, A. J.; Flint, J.; Narayan, P.; Michaels, T. C. T.; Dobson, C. M.; Frenkel, D.; Knowles, T. P. J.; Klenerman, D. Quantitative Analysis of Co-Oligomer Formation by Amyloid-Beta Peptide Isoforms. *Sci. Rep.* **2016**, *6*, 28658.

**APPENDIX**  
**Mass spectrometry results to control  $\alpha$ -synuclein labeling efficiency**

Table A

| <b>Protein mass values (theoretical)</b> |                        |                  |                  |
|------------------------------------------|------------------------|------------------|------------------|
| $\alpha$ Syn variant                     |                        | <i>+Alexa488</i> | <i>+Alexa594</i> |
|                                          | Unlabeled protein mass | +700 Da          | +887 Da          |
| wt                                       | 14460.1                |                  |                  |
| A90C                                     | 14492.2                | 15192.2          | 15379.2          |
| A30P                                     | 14486.1                |                  |                  |
| A30P/A90C                                | 14518.2                | 15218.2          | 15405.2          |
| A53T                                     | 14490.1                |                  |                  |
| A53T/A90C                                | 14522.2                | 15222.2          | 15409.2          |
| E46K                                     | 14459.2                |                  |                  |
| E46K/A90C                                | 14491.2                | 15191.2          | 15378.2          |

Variations from mass spec values of <5 Da are due to mass calibration methodologies (optimized for small molecules)



# A90C + AlexaFluor488

+TOF MS: 1.417 to 1.467 min from 05May\_Laura\_A90C\_488.wiff  
 a=3.56403392859159850e-004, t0=7.99587048689066290e+001

Max. 1048.3 counts.

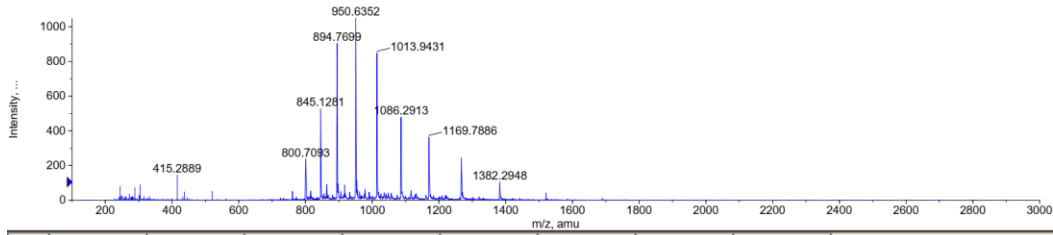

|   | Mass (avg.) | Mass (mono.) | Apex Mass  | Area       | Start Scan | Stop Scan | Score  | Evidence |
|---|-------------|--------------|------------|------------|------------|-----------|--------|----------|
| 1 | 15193.9680  |              | 15193.8626 | 23738.4419 | 85         | 88        | 1.0000 | C        |
| 2 | 15212.9850  |              | 15212.4163 | 4707.9401  | 85         | 88        | 1.0000 | C        |
| 3 | 15235.7390  |              | 15235.9505 | 2874.6825  | 85         | 88        | 1.0000 | C        |
| 4 | 15198.9003  |              | 15198.8870 | 2324.6210  | 85         | 88        | 1.0000 | C        |
| 5 | 15265.9439  |              | 15265.9972 | 1145.8105  | 85         | 88        | 1.0000 | C        |
| 6 | 15228.0814  |              | 15228.0745 | 1063.2306  | 85         | 88        | 1.0000 | C        |

Mass reconstruction of +TOF MS: 1.417 to 1.467 min from 05May\_Laura\_A90C\_488.wiff

Max. 4468.4 cps.

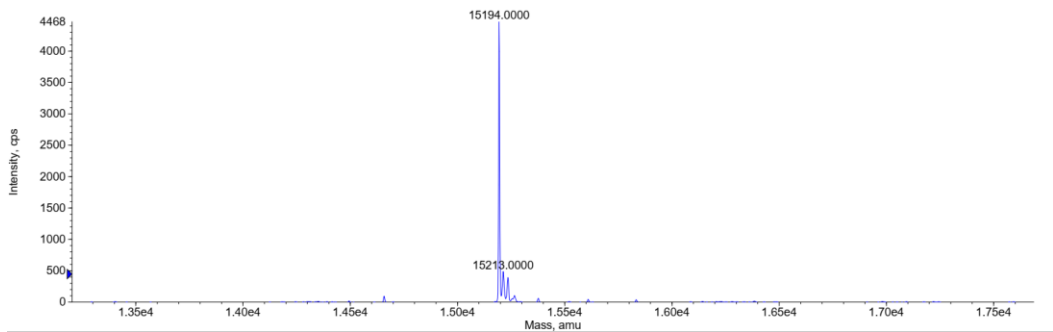

# Undetected unlabeled protein

+TOF MS: 2.653 to 3.286 min from 13Sep\_Laura\_A90c\_488.wiff  
 a=3.56406513581073800e-004, t0=8.40121480951674040e+001

Max. 747.5 counts.

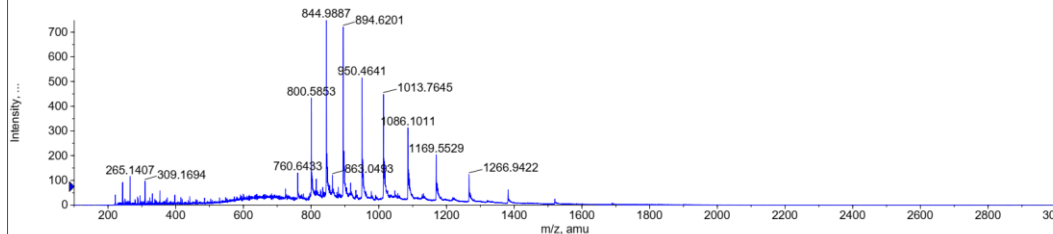

|   | Mass (avg.) | Mass (mono.) | Apex Mass  | Area       | Start Scan | Stop Scan | Score  | Evidence |
|---|-------------|--------------|------------|------------|------------|-----------|--------|----------|
| 1 | 15191.4622  |              | 15191.5060 | 20077.1112 | 159        | 197       | 1.0000 | C        |
| 2 | 15231.6610  |              | 15231.5178 | 7393.1476  | 159        | 197       | 1.0000 | C        |
| 3 | 15212.7157  |              | 15212.7840 | 7303.7548  | 159        | 197       | 1.0000 | C        |
| 4 | 15256.5891  |              | 15257.4111 | 5735.3003  | 159        | 197       | 1.0000 | C        |

Mass reconstruction of +TOF MS: 2.653 to 3.286 min from 13Sep\_Laura\_A90c\_488.wiff

Max. 3078.2 cps.

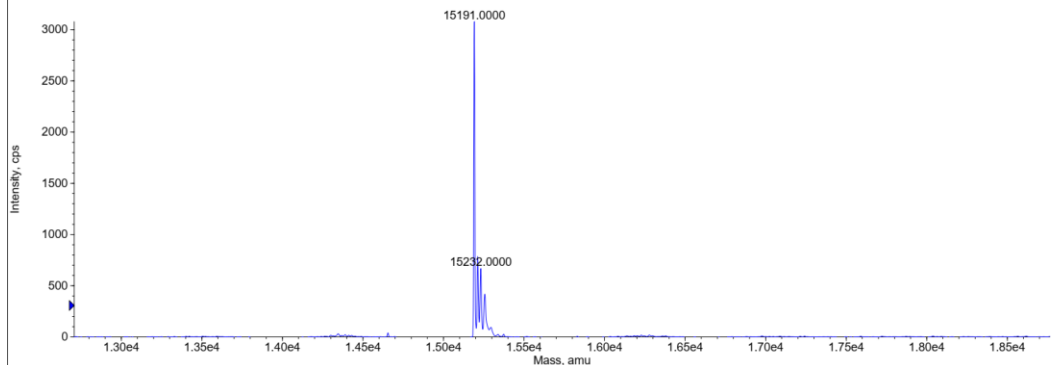

# Undetected unlabeled protein

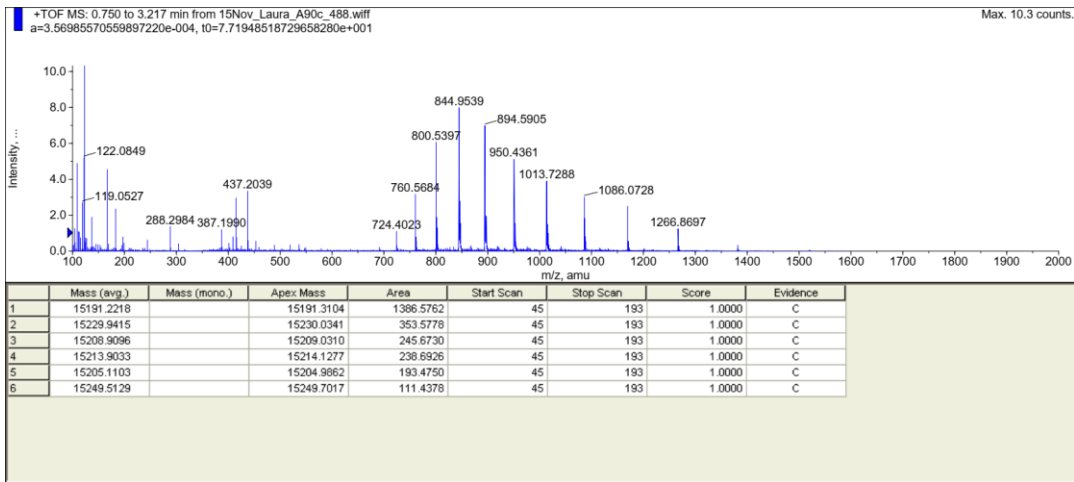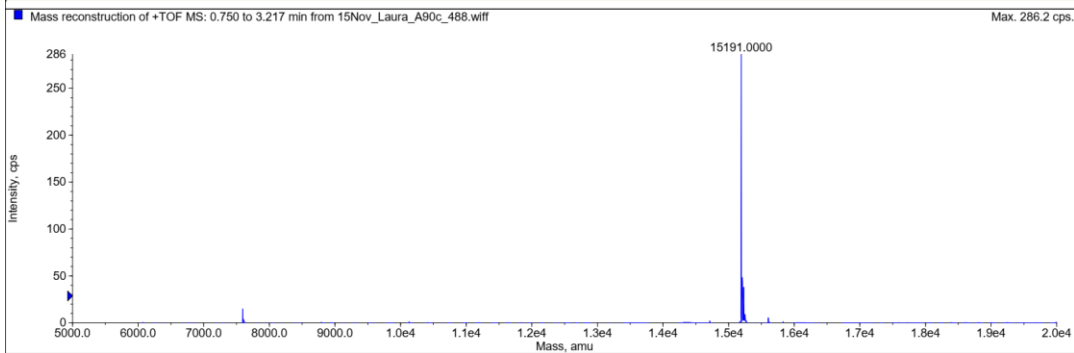

Undetected unlabeled protein

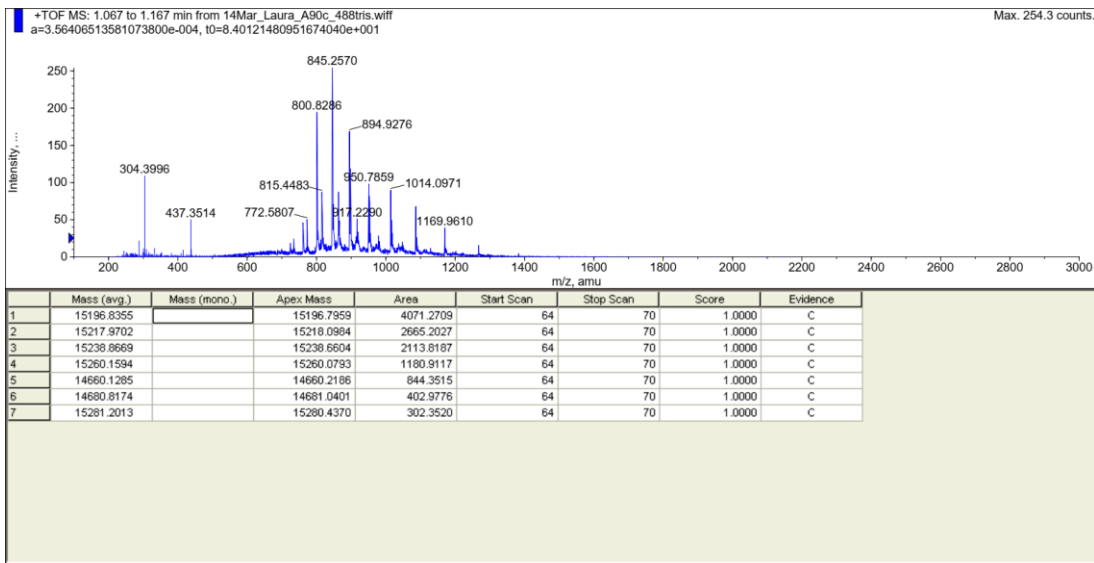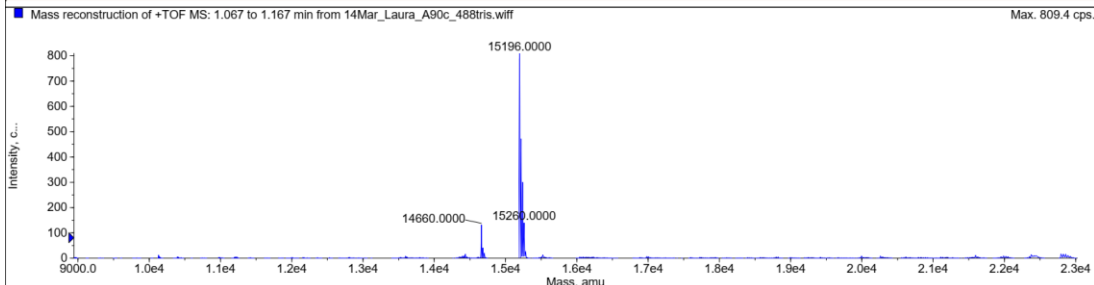

Detectable unlabeled protein - Sample discarded (see notes below).

Notes on the previous spectrum (bottom of p. 3): In the presence of unlabeled protein/protein batches containing protein with adducts (mass 14660, for example), the areas of the masses corresponding to labeling protein /other species have been integrated. In the case of adduct corresponding to more than the 10% compared to labeled protein (mass 15196), the sample has been discarded.

Here we report this example: species corresponding to A90C-488 labeled protein and various salt complexes are mass the ones above 15 kDa (lines 1, 2, 3, 4, 7), while unlabeled protein masses are reported in lines 5 and 6. In this case, this batch has been discarded as the unlabeled protein adduct is around 12%.

### A90C + AlexaFluor594

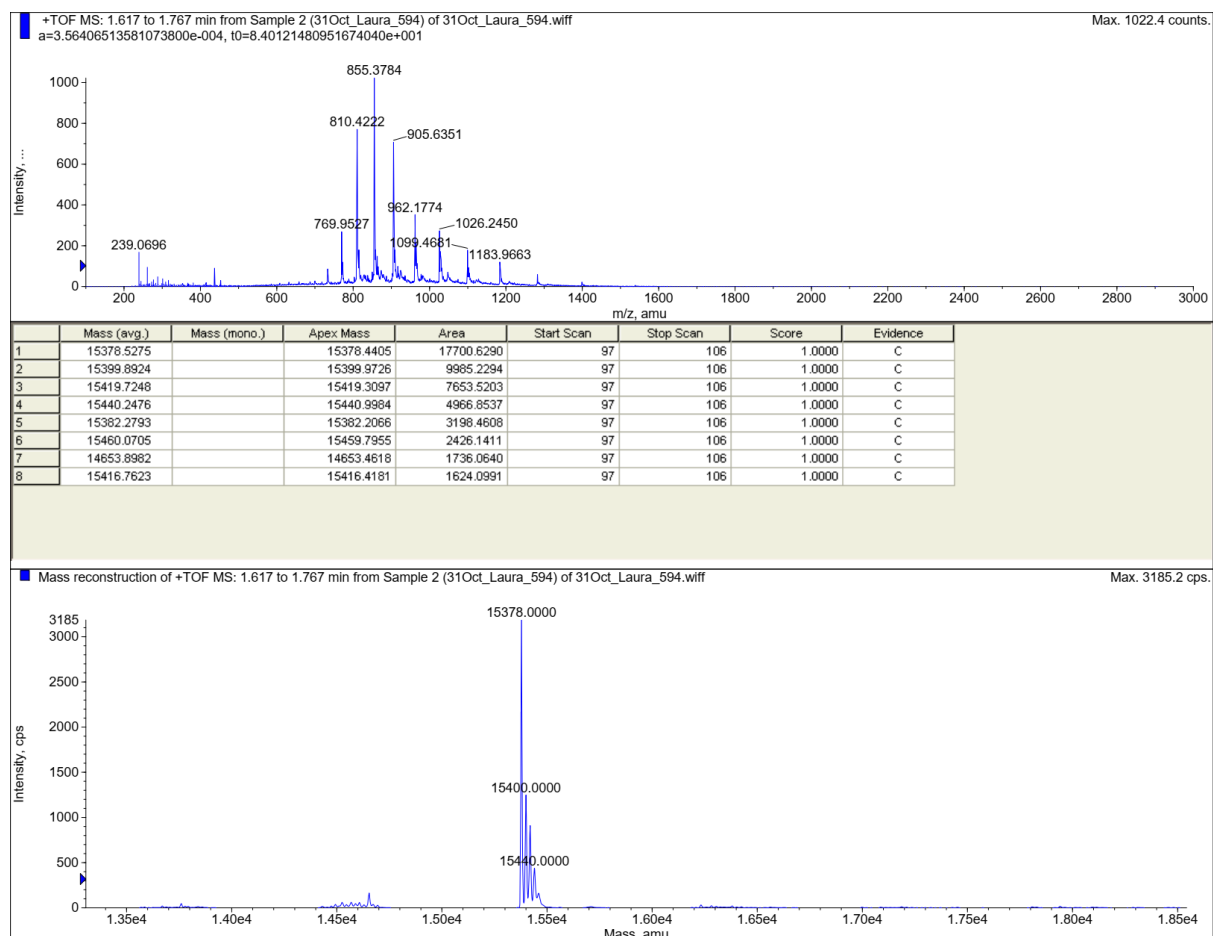

ESI analysis

cap 3000V, cone 70V, calib CytC same file, 70%MeOH/0.2%formic mobile phase

Lando A90CAF594. C18zt, elute 50%MeCN/0.2%fo

LANDO\_A90CAF594 28 (2.390) M1 [Ev0,It15] (Gs,1.200,600,2000,0.40,L60,R40); Sm (SG, 2x20.00); Cm (1.53)

24-Jul-2014

TOF MS ES+  
7.85e4  
A: 15379.66±0.30  
B: 14654.50±0.38

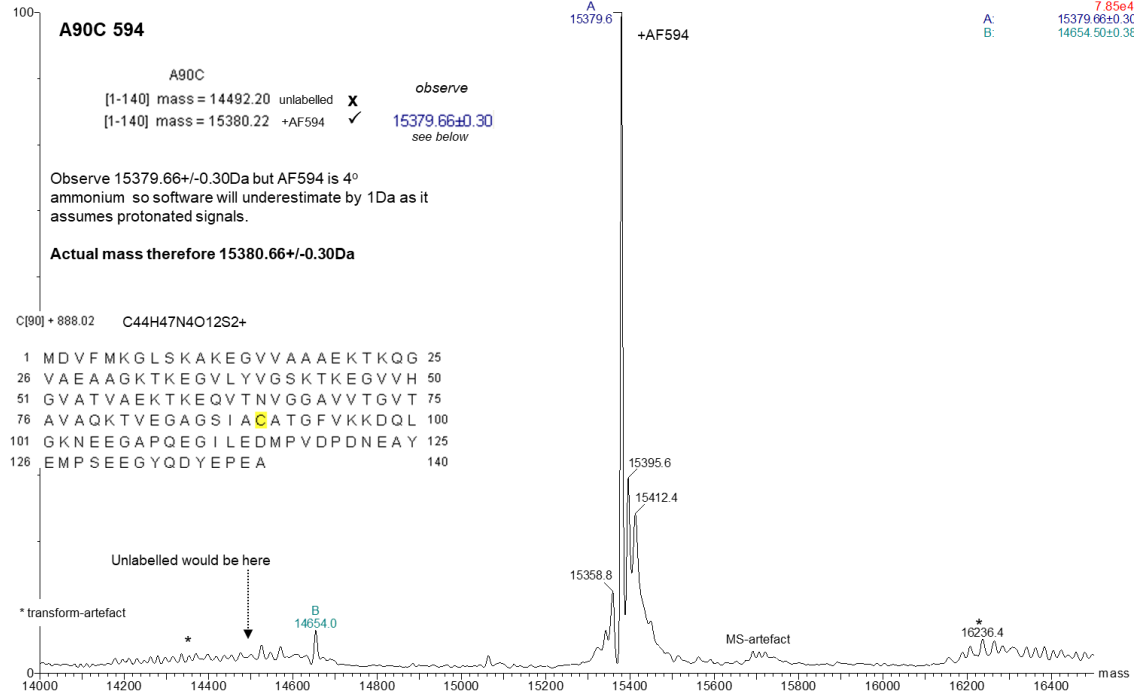

ESI analysis

cap 3000V, cone 70V, calib ubiquitin same file, 70%MeOH/0.2%formic mobile phase

Lando WT594 C18zt ds, el50%MeCN/0.2%fo

LANDO\_WT594 22 (1.878) M1 [Ev-220156,It15] (Gs,1.500,650,2000,0.50,L40,R40); Sm (SG, 2x20.00); Cm (1.40)

13-May-2014

TOF MS ES+  
1.49e5  
A: 15379.59±0.45

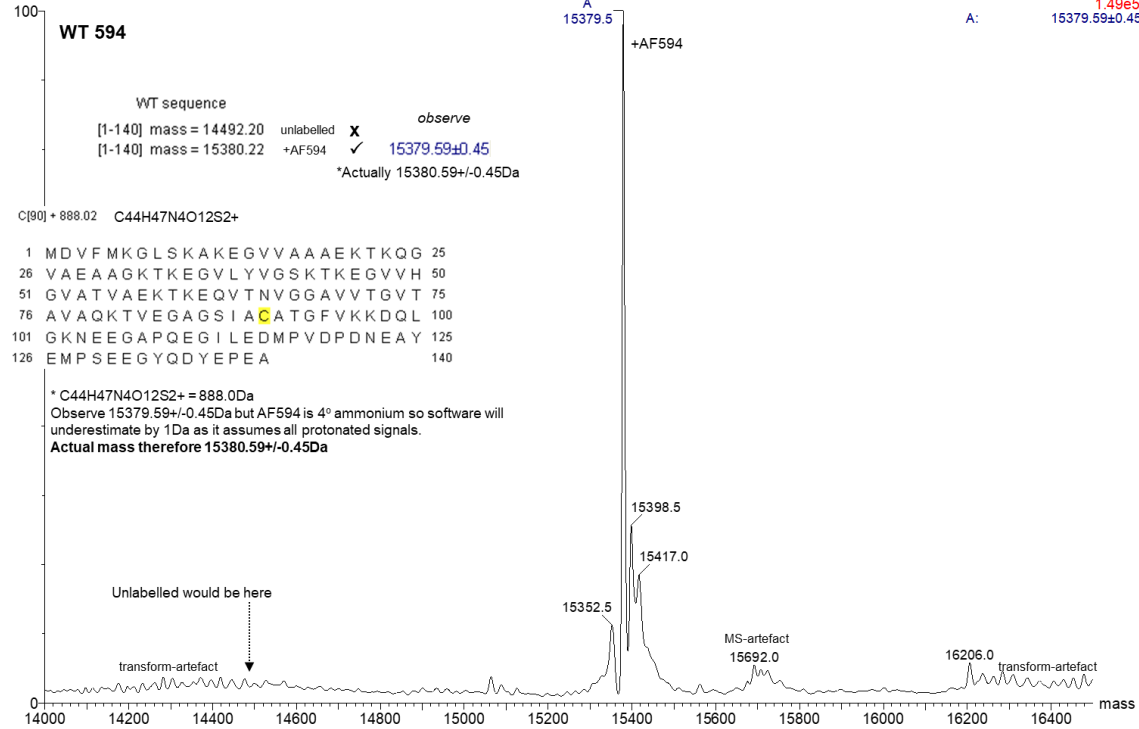

# A30P A90C + AlexaFluor488

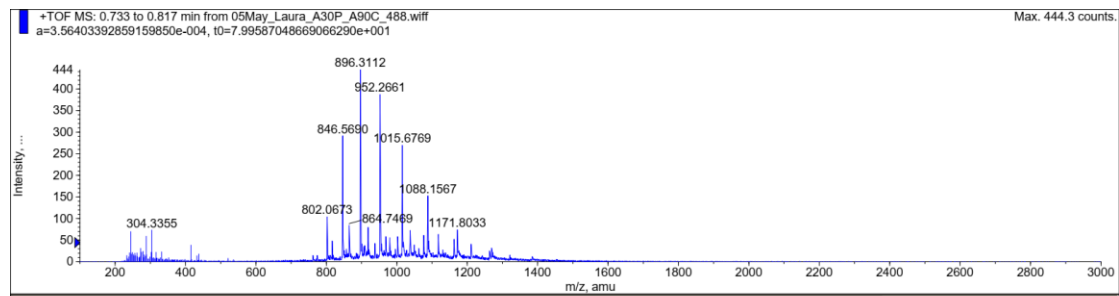

|   | Mass (avg.) | Mass (mono.) | Apex Mass  | Area      | Start Scan | Stop Scan | Score  | Evidence |
|---|-------------|--------------|------------|-----------|------------|-----------|--------|----------|
| 1 | 15220.1865  |              | 15220.1904 | 8090.8354 | 44         | 49        | 1.0000 | C        |
| 2 | 15239.0661  |              | 15238.6380 | 2047.1615 | 44         | 49        | 1.0000 | C        |
| 3 | 15260.4048  |              | 15260.6214 | 1716.6494 | 44         | 49        | 1.0000 | C        |

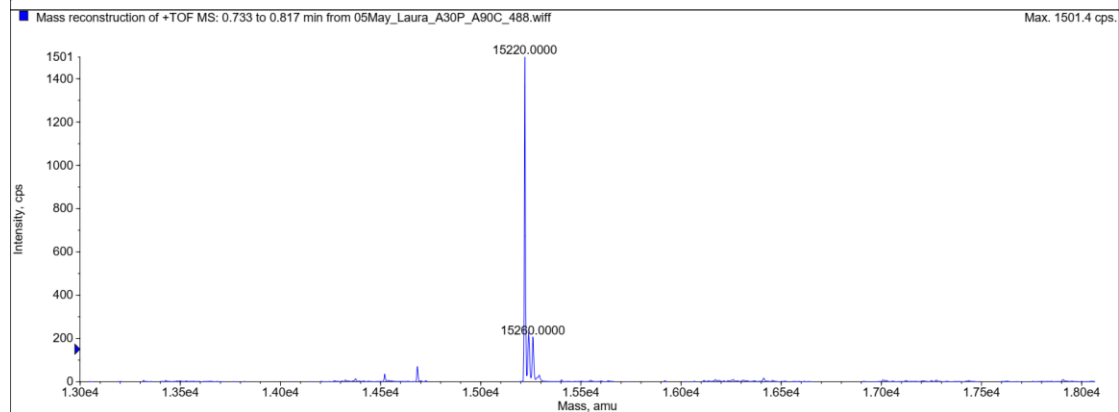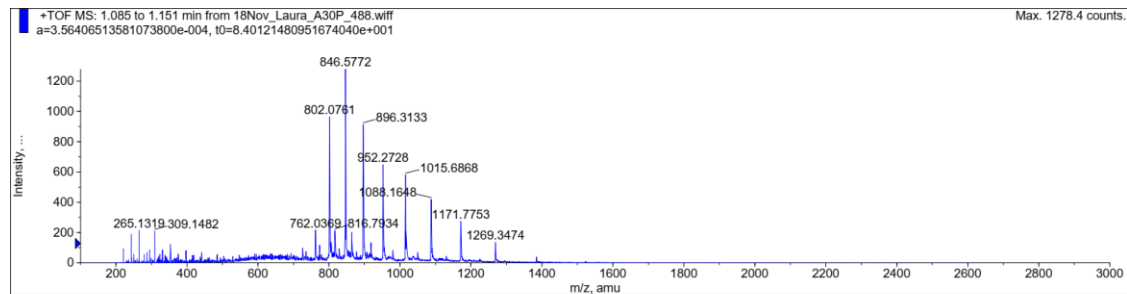

|   | Mass (avg.) | Mass (mono.) | Apex Mass  | Area       | Start Scan | Stop Scan | Score  | Evidence |
|---|-------------|--------------|------------|------------|------------|-----------|--------|----------|
| 1 | 15220.4483  |              | 15220.3473 | 29077.9182 | 65         | 69        | 1.0000 | C        |
| 2 | 15241.5234  |              | 15241.2257 | 7071.7664  | 65         | 69        | 1.0000 | C        |
| 3 | 15260.8614  |              | 15260.8890 | 5637.1457  | 65         | 69        | 1.0000 | C        |
| 4 | 15280.7550  |              | 15279.9514 | 2501.9496  | 65         | 69        | 1.0000 | C        |
| 5 | 15237.6030  |              | 15237.2267 | 1938.8473  | 65         | 69        | 1.0000 | C        |

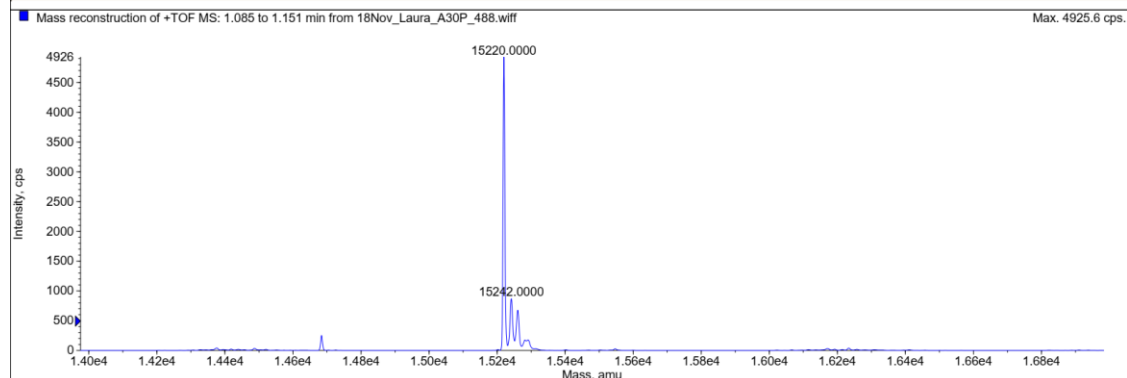

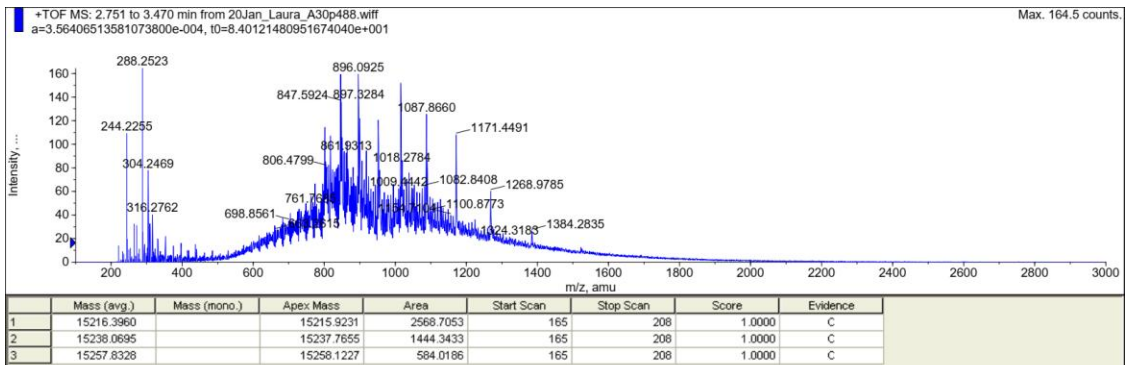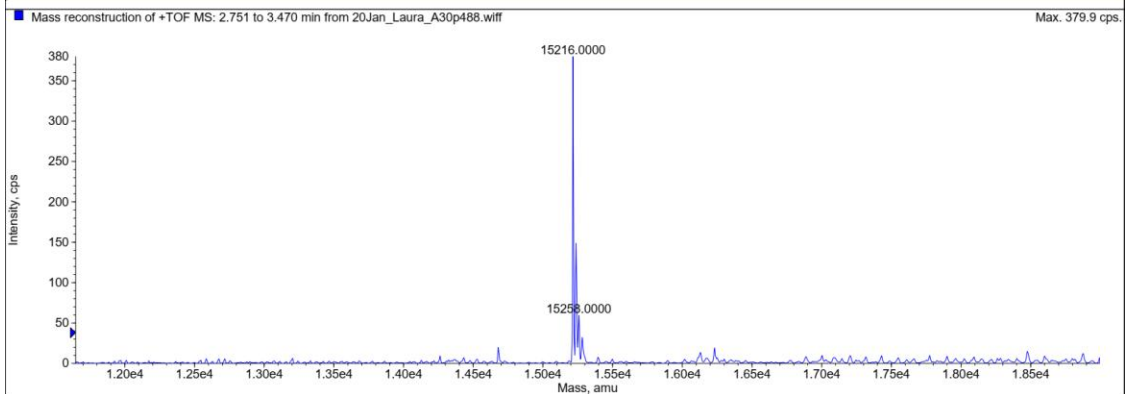

### A30P A90C + AlexaFluor594

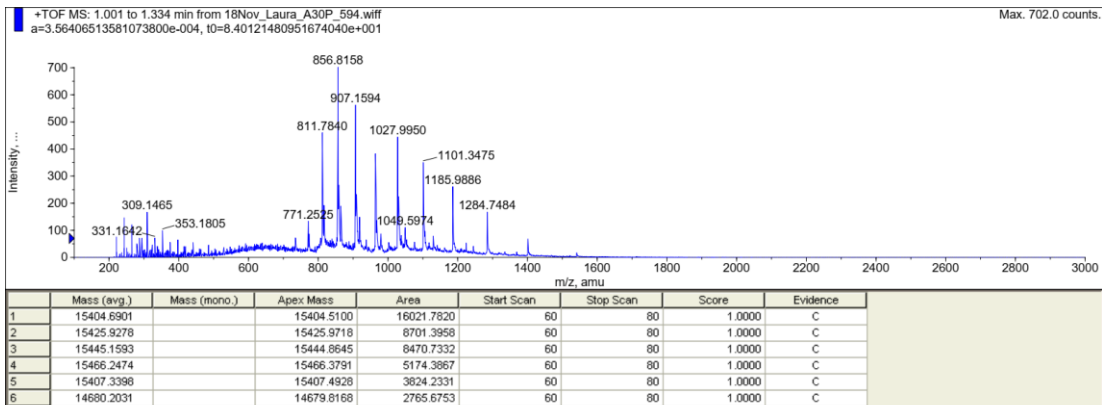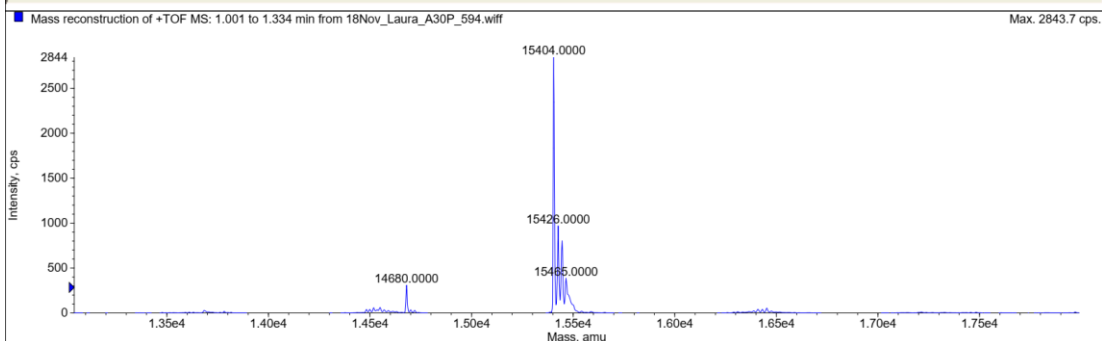

(protein product at 14680 Da is around 6.5% of the total protein species: sample kept for analysis)

ESI analysis

cap 3000V, cone 70V, calib ubiquitin same file, 70%MeOH/0.2%formic mobile phase

Lando A30P594 C18zt ds, el50%MeCN/0.2%fo

LANDO\_A30P594 24 (2.049) M1 [Ev0..It15] (Gs,1.500.650:2000.0.50,L40,R40); Sm (SG, 2x20.00); Cm (1.44)

13-May-2014

TOF MS ES+

1.71e5

15405.79±0.38

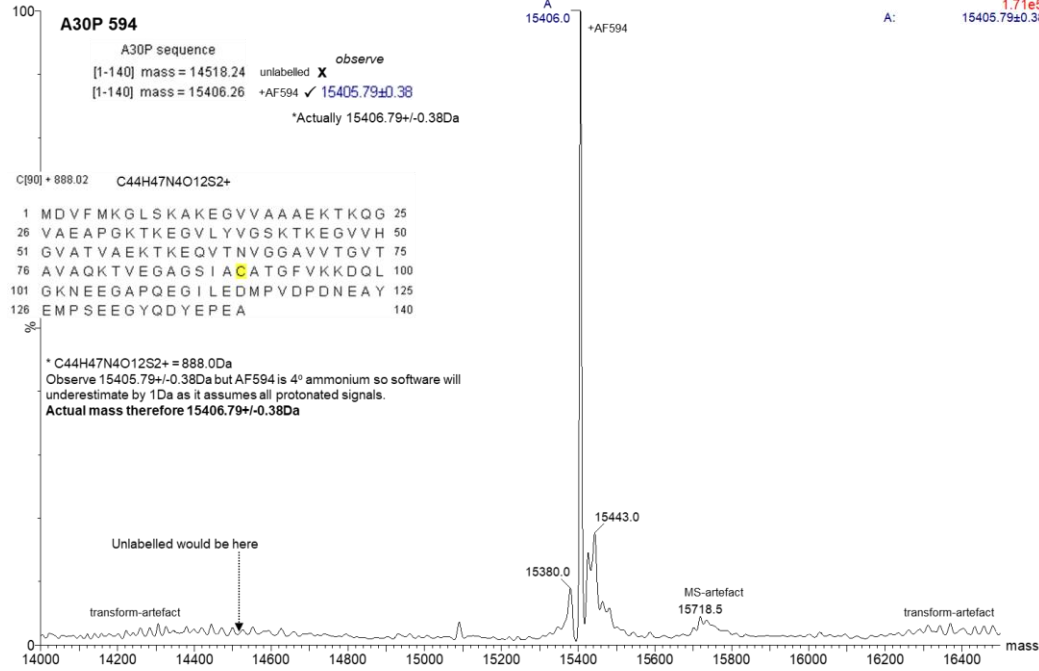

## A53T A90C + AlexaFluor488

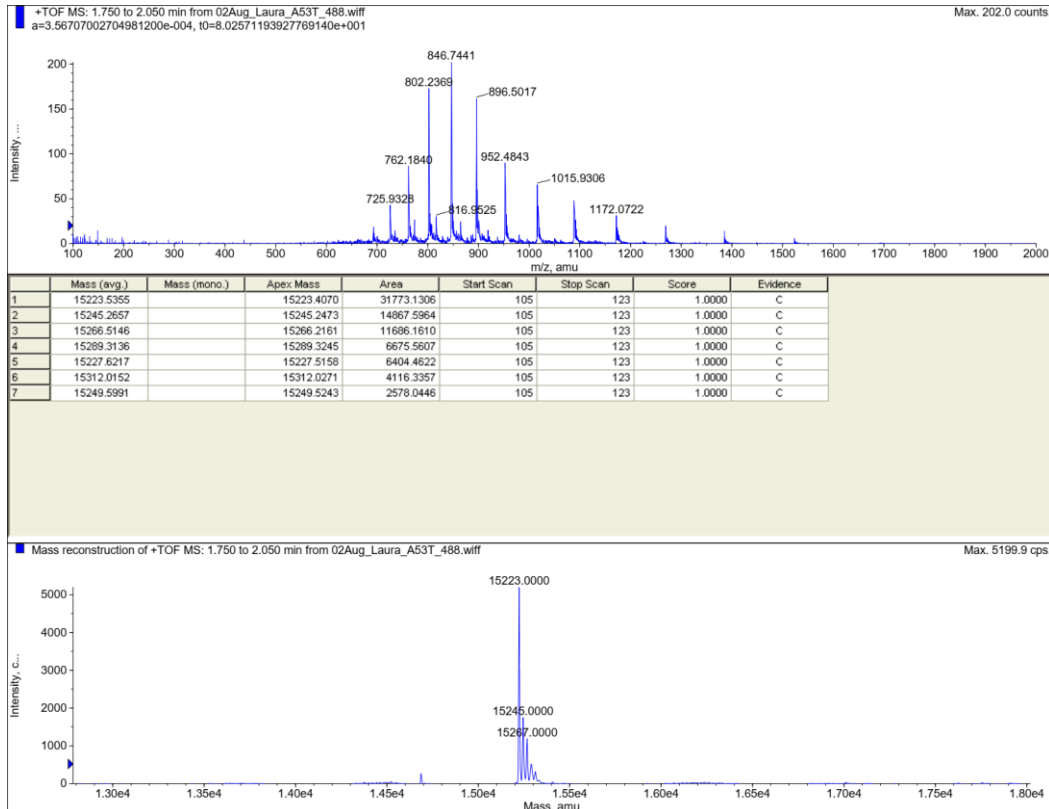

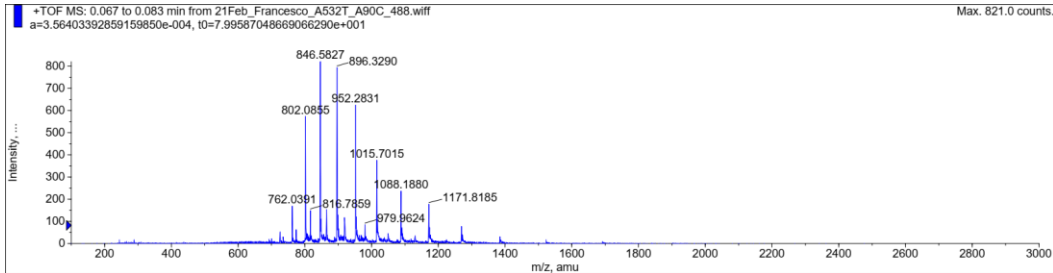

|   | Mass (avg.) | Mass (mono.) | Apex Mass  | Area       | Start Scan | Stop Scan | Score  | Evidence |
|---|-------------|--------------|------------|------------|------------|-----------|--------|----------|
| 1 | 15220.8401  |              | 15220.7797 | 20740.2985 | 4          | 5         | 1.0000 | C        |
| 2 | 15240.8010  |              | 15240.4090 | 4234.9762  | 4          | 5         | 1.0000 | C        |
| 3 | 15261.9068  |              | 15262.2757 | 3863.4330  | 4          | 5         | 1.0000 | C        |
| 4 | 14684.4526  |              | 14684.3874 | 1902.7716  | 4          | 5         | 1.0000 | C        |
| 5 | 15291.5817  |              | 15291.7120 | 1226.1332  | 4          | 5         | 1.0000 | C        |
| 6 | 15243.8878  |              | 15243.8621 | 1209.6188  | 4          | 5         | 1.0000 | C        |
| 7 | 15281.7066  |              | 15280.9006 | 1201.3742  | 4          | 5         | 1.0000 | C        |

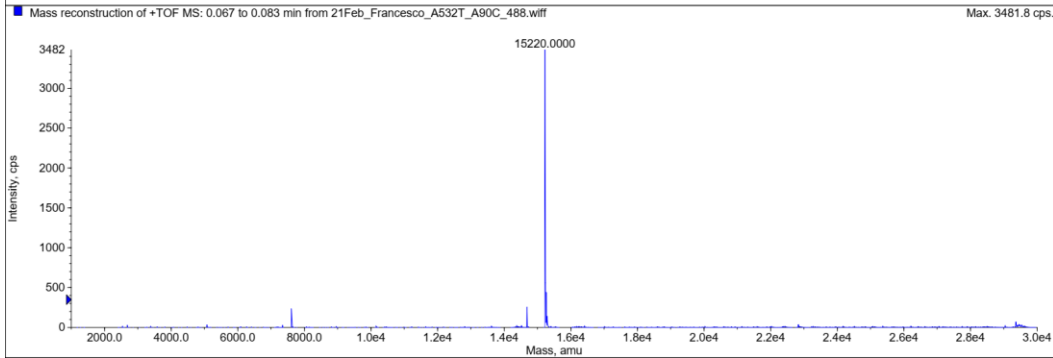

## A53T A90C + AlexaFluor594

ESI analysis cap 3000V, cone 70V, calib ubiquitin same file, 70%MeOH/0.2%formic mobile phase

Lando A53T Af488, 594. C18zt ds, el 50%MeCN/0.2%fo

LANDO\_A53T\_AF488,594 (2 (5.291) M1 [Ev0,It15] (Gs,1.300,600:1800,0.30,L60,R60); Sm (SG, 2x20.00); Cm (39:72)

08-May-2014

TOF MS ES+

1.72e5

A: 15094.13±0.17

B: 15409.44±0.30

C: 15447.25±0.35

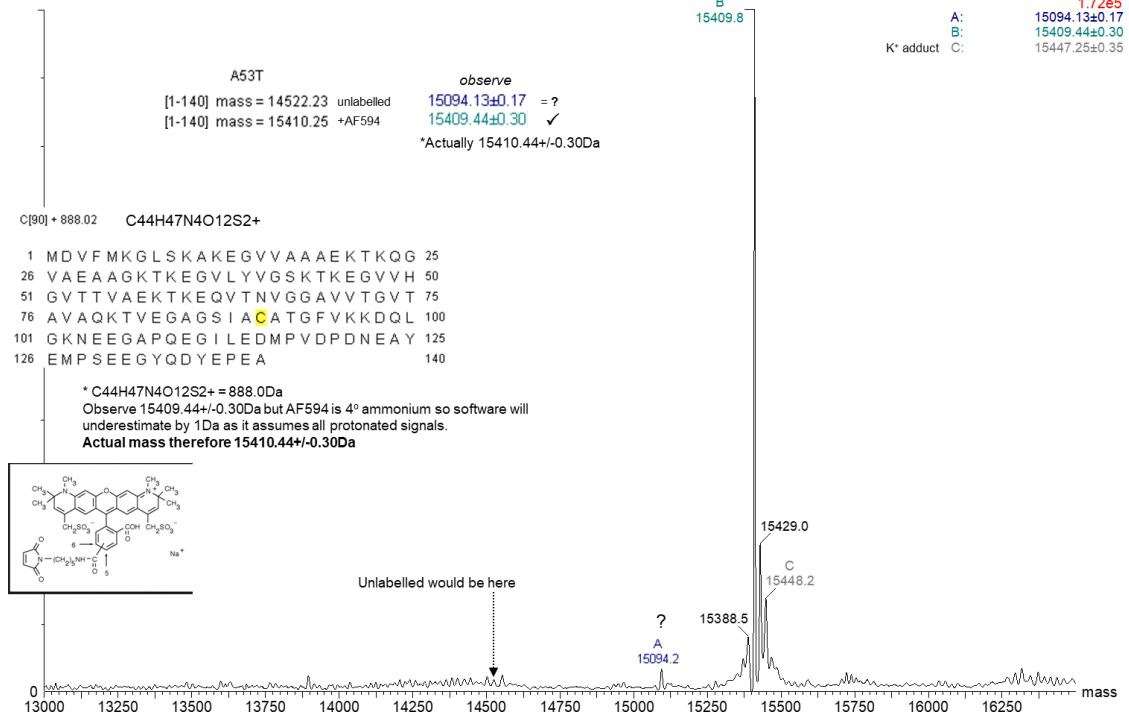



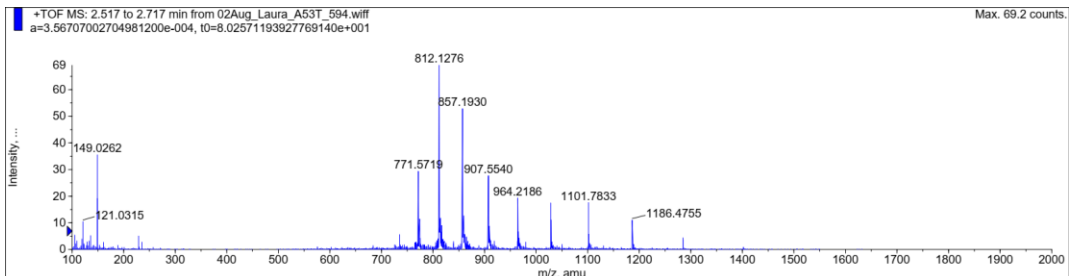

|   | Mass (avg.) | Mass (mono.) | Apex Mass  | Area      | Start Scan | Stop Scan | Score  | Evidence |
|---|-------------|--------------|------------|-----------|------------|-----------|--------|----------|
| 1 | 15411.6700  |              | 15411.6143 | 8688.9123 | 151        | 163       | 1.0000 | C        |
| 2 | 15431.2884  |              | 15431.4214 | 2545.2239 | 151        | 163       | 1.0000 | C        |
| 3 | 15453.9244  |              | 15453.8265 | 1504.2321 | 151        | 163       | 1.0000 | C        |
| 4 | 15442.7034  |              | 15442.8446 | 877.5901  | 151        | 163       | 1.0000 | C        |
| 5 | 14686.8416  |              | 14686.5447 | 730.6101  | 151        | 163       | 1.0000 | C        |
| 6 | 15482.8059  |              | 15483.3929 | 663.4614  | 151        | 163       | 1.0000 | C        |
| 7 | 15395.7411  |              | 15396.0445 | 490.2291  | 151        | 163       | 1.0000 | C        |
| 8 | 15470.2625  |              | 15469.6452 | 460.1285  | 151        | 163       | 1.0000 | C        |

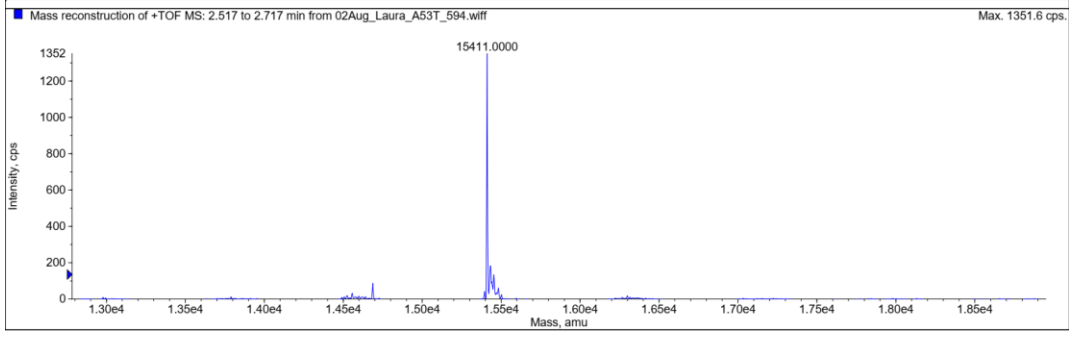

## E46K A90C + AlexaFluor488

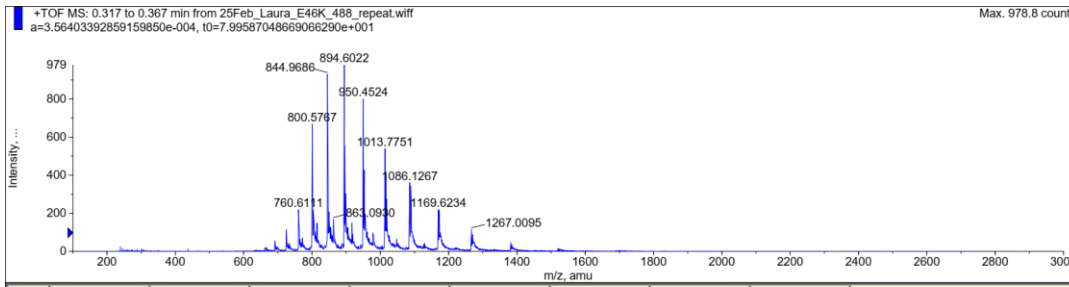

|   | Mass (avg.) | Mass (mono.) | Apex Mass  | Area       | Start Scan | Stop Scan | Score  | Evidence |
|---|-------------|--------------|------------|------------|------------|-----------|--------|----------|
| 1 | 15191.9087  |              | 15191.6212 | 27455.8445 | 19         | 22        | 1.0000 | C        |
| 2 | 15213.5298  |              | 15213.4159 | 16506.4800 | 19         | 22        | 1.0000 | C        |
| 3 | 15235.1164  |              | 15235.0560 | 16283.9311 | 19         | 22        | 1.0000 | C        |
| 4 | 15258.0415  |              | 15258.3999 | 13485.0100 | 19         | 22        | 1.0000 | C        |
| 5 | 15279.9477  |              | 15280.2704 | 8752.1050  | 19         | 22        | 1.0000 | C        |
| 6 | 15301.7851  |              | 15301.7988 | 5928.2029  | 19         | 22        | 1.0000 | C        |
| 7 | 15325.3028  |              | 15325.3963 | 3084.3801  | 19         | 22        | 1.0000 | C        |
| 8 | 15216.1852  |              | 15216.3118 | 2893.3399  | 19         | 22        | 1.0000 | C        |

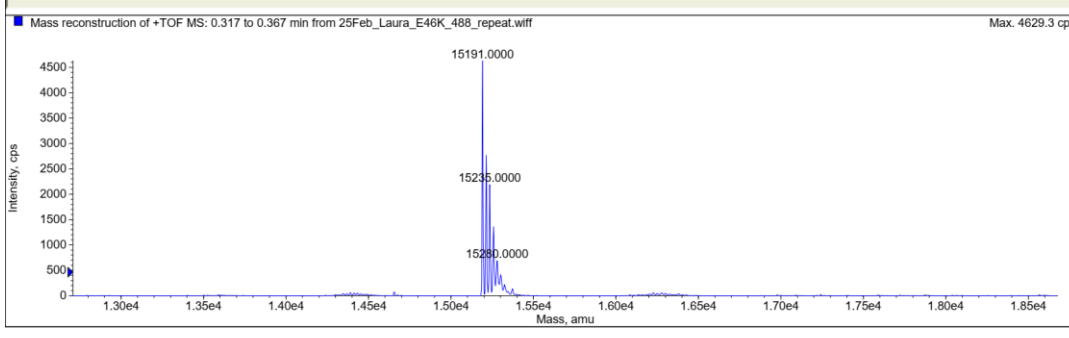

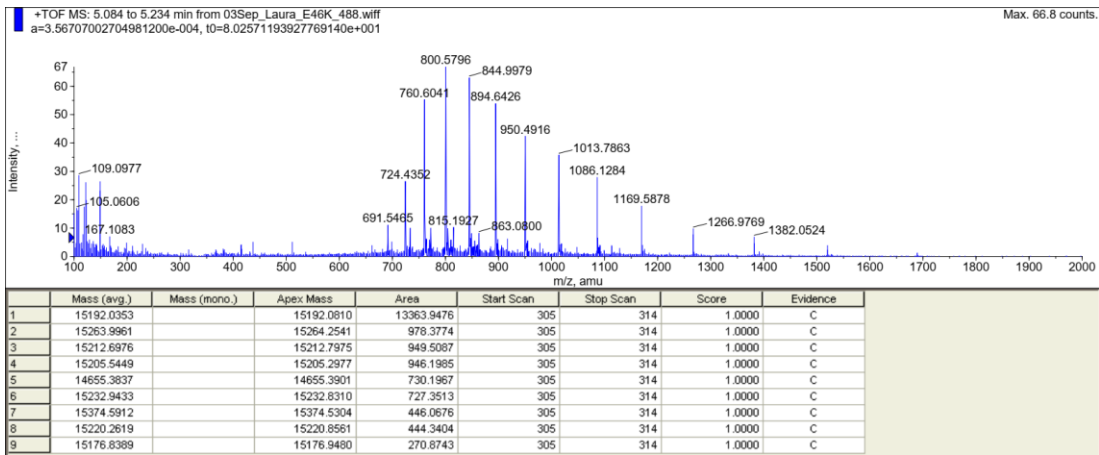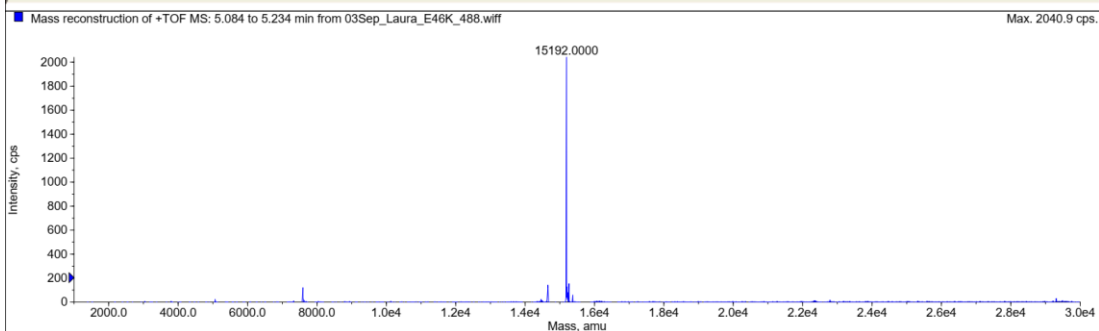

### E46K A90C + AlexaFluor594

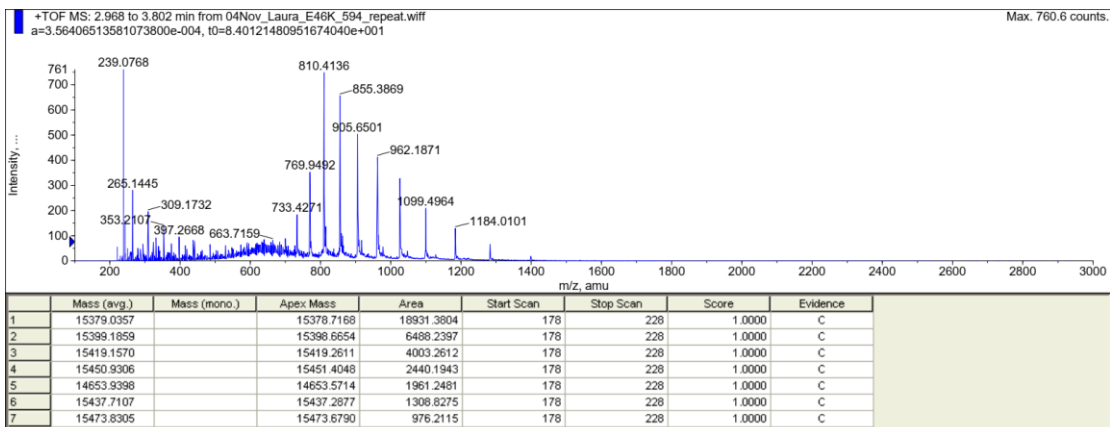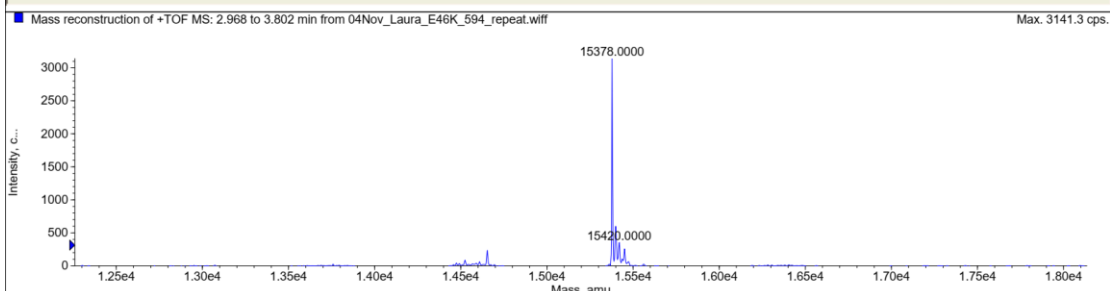

+TOF MS: 2.767 to 2.917 min from 03Sep\_Laura\_E46K\_594.wiff  
 a=3.56707002704981200e-004, t0=8.02571193927769140e+001 Max. 83.8 counts.

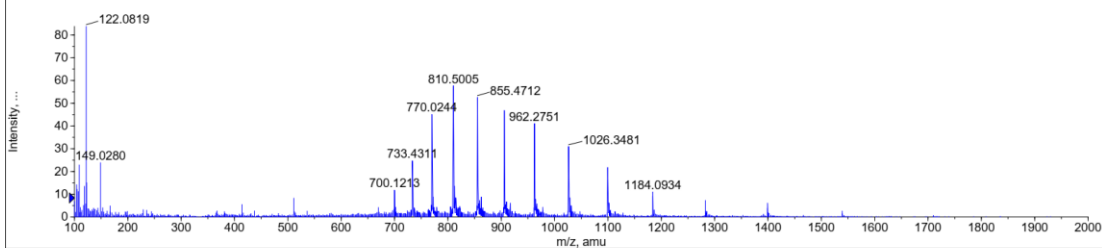

|    | Mass (avg.) | Mass (mono.) | Apex Mass  | Area       | Start Scan | Stop Scan | Score  | Evidence |
|----|-------------|--------------|------------|------------|------------|-----------|--------|----------|
| 1  | 15380.5494  |              | 15380.5073 | 11911.0992 | 166        | 175       | 1.0000 | C        |
| 2  | 15412.0301  |              | 15412.1732 | 2769.8532  | 166        | 175       | 1.0000 | C        |
| 3  | 15395.4483  |              | 15395.3441 | 2589.8950  | 166        | 175       | 1.0000 | C        |
| 4  | 15452.3984  |              | 15452.6537 | 1193.0292  | 166        | 175       | 1.0000 | C        |
| 5  | 15424.8903  |              | 15425.2612 | 896.4905   | 166        | 175       | 1.0000 | C        |
| 6  | 14655.3959  |              | 14655.1611 | 825.6120   | 166        | 175       | 1.0000 | C        |
| 7  | 15365.3737  |              | 15365.3667 | 739.9532   | 166        | 175       | 1.0000 | C        |
| 8  | 15398.7985  |              | 15398.6306 | 667.9696   | 166        | 175       | 1.0000 | C        |
| 9  | 15438.1588  |              | 15437.8309 | 404.4049   | 166        | 175       | 1.0000 | C        |
| 10 | 15481.8194  |              | 15481.8797 | 308.0934   | 166        | 175       | 1.0000 | C        |

Mass reconstruction of +TOF MS: 2.767 to 2.917 min from 03Sep\_Laura\_E46K\_594.wiff Max. 1764.6 cps.

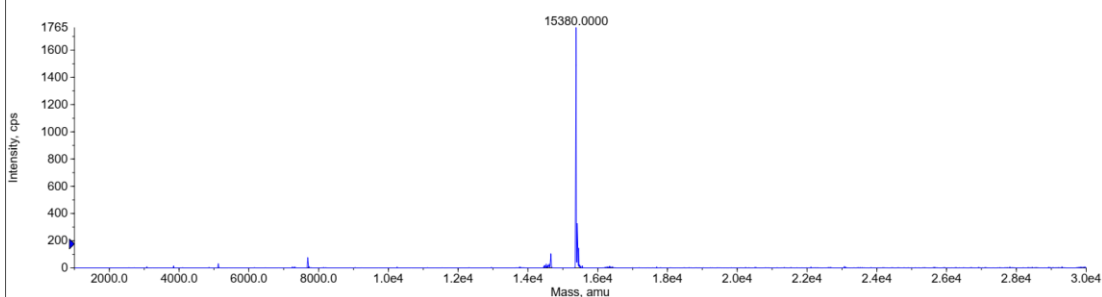

+TOF MS: 1.017 to 1.167 min from 09Jan\_Laura\_E46k\_594.wiff  
 a=3.56406513581073800e-004, t0=8.40121480951674040e+001 Max. 258.3 counts.

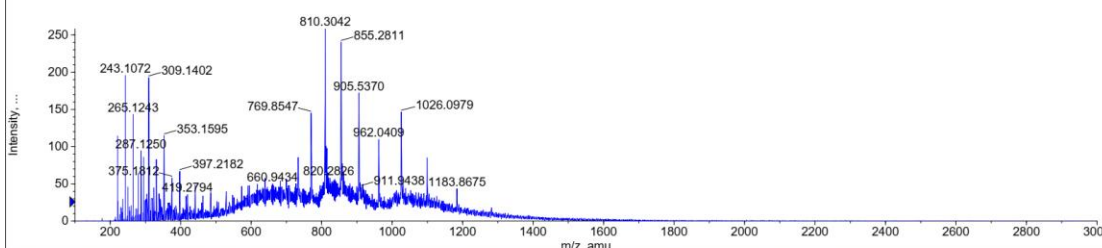

|   | Mass (avg.) | Mass (mono.) | Apex Mass  | Area      | Start Scan | Stop Scan | Score  | Evidence |
|---|-------------|--------------|------------|-----------|------------|-----------|--------|----------|
| 1 | 15376.9837  |              | 15376.6561 | 4489.2672 | 61         | 70        | 1.0000 | C        |
| 2 | 15396.7630  |              | 15397.4559 | 1080.1214 | 61         | 70        | 1.0000 | C        |
| 3 | 15416.6555  |              | 15415.8666 | 420.7365  | 61         | 70        | 1.0000 | C        |

Mass reconstruction of +TOF MS: 1.017 to 1.167 min from 09Jan\_Laura\_E46k\_594.wiff Max. 840.1 cps.

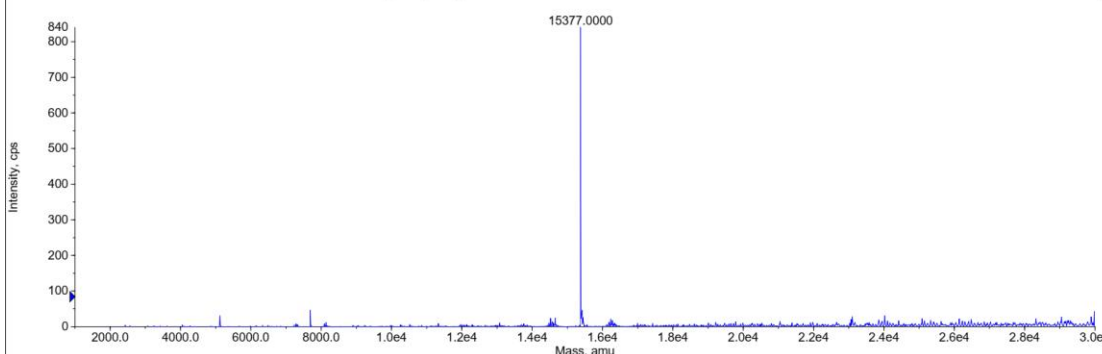

Supplement: nn8b03575_si_001.pdf [file nn8b03575_si_001.pdf]
